# Supplementary material
Source: PubMed Central journal article supplement (PMC6193393)
Supplement: zam021188814s1.pdf [file zam021188814s1.pdf]

Supporting Information:

**Transposase-Mediated Chromosomal Integration of Exogenous Genes in**

*Acidithiobacillus ferrooxidans*

Yuta Inaba, Indrani Banerjee, Timothy Kernan, and Scott Banta\*

Department of Chemical Engineering, Columbia University, New York, NY, USA

Table S1. DNA and amino acid sequences for codon-optimized version of the hyperactive mini-Tn5 transposase, Tnp, expressed in *A. ferrooxidans*.

|         |                                                                                                                                                                                                                                                                                                                                                                                                                                                                                                                                                                                                                                                                                                                                                                                                                                                                                                                                                                                                                                                                                                                                                                                                                                                                                                                                                                                                                                                                                                                                                                                                                                                                         |
|---------|-------------------------------------------------------------------------------------------------------------------------------------------------------------------------------------------------------------------------------------------------------------------------------------------------------------------------------------------------------------------------------------------------------------------------------------------------------------------------------------------------------------------------------------------------------------------------------------------------------------------------------------------------------------------------------------------------------------------------------------------------------------------------------------------------------------------------------------------------------------------------------------------------------------------------------------------------------------------------------------------------------------------------------------------------------------------------------------------------------------------------------------------------------------------------------------------------------------------------------------------------------------------------------------------------------------------------------------------------------------------------------------------------------------------------------------------------------------------------------------------------------------------------------------------------------------------------------------------------------------------------------------------------------------------------|
| Tnp DNA | <p>ATGATCACATCCGCACTTCACCGAGCAGCAGATTGGGCAAAAAGCG<br/> TTTTAGTTCAGCCGCGCTGGGTGATCCCCGCCGTACCGCCCGTCTG<br/> GTGAACGTCGCCGCACAGCTCGCCAAGTACTCGGGCAAATCCATTAC<br/> AATTTCCAGCGAAGGCTCAAAGGCCATGCAAGAGGGGCGCCTATCGC<br/> TTCATCCGCAATCCGAATGTCAGCGCCGAGGCCATTCGGAAGGCCG<br/> GTGCGATGCAGACCGTCAAATTGGCCAAGAATTCCCCGAGCTGTTG<br/> GCGATCGAAGATACGACGAGCCTTTCATATCGTCATCAAGTGGCGG<br/> AAGAACTGGGAAAAGTGGGTTCCATCCAGGACAAGTCTCGCGGTTG<br/> GTGGGTACACTCGGTGCTGCTCCTGGAAGCTACCACCTCCGTACCG<br/> TGGGCTTGTTCACCAAGAGTGGTGGATGCGCCCGGATGATCCGGC<br/> GGACGCGGATGAGAAAGAATCGGGGAAATGGCTGGCTGCTGCCGCG<br/> ACCAGCCGGCTGCGGATGGGTAGTATGATGAGCAACGTCATAGCCG<br/> TCTGTGACCGCGAAGCCGACATCCATGCCTATCTGCAGGACAAGCTC<br/> GCGCATAATGAACGTTTTGTGGTTCGCTCCAAGCACCCGCGCAAAGA<br/> CGTTGAGTCGGGGCTGTACCTGTACGACCACCTCAAAAACCAGCCTG<br/> AGTTGGGCGGATACCAGATTTCCATTGGCCAGAAAGGCGTCGTTGAC<br/> AAGCGGGTAAGCGCAAGAATCGCCCCGCCGGAAAGCCTCTCTCT<br/> CCCTGCGGAGTGGGCGTATCACCTCAAGCAAGGTAATATCACGCTC<br/> AACGCCGTACTGGCGGAAGAGATCAACCCCCCAAAGGTGAGACTC<br/> CATTGAAGTGGCTGCTGCTGACCAGCGAGCCCGTGGAGTCTCTGGCC<br/> CAAGCGCTGCGCGTGATTGACATTTATACCACCGGTGGCGAATCGA<br/> AGAATTCATAAAGCCTGGAAAACGGGTGCCGGAGCGGAGCGTCAG<br/> CGGATGGAAGAACCTGATAATCTCGAACGCATGGTCAGTATCCTCA<br/> GCTTTGTGGCCGTGCGCCTGCTGCAACTGCGTGAGTCGTTACCCCA<br/> CCGCAGGCCCTGCGAGCTCAAGGGCTCTTGAAAGAAGCCGAACATG<br/> TCGAGTCCCAAAGCGCCGAAACGGTACTGACGCCGGATGAGTGCCA<br/> GTTGTTGGGATATCTCGATAAGGGCAAGCGCAAGCGGAAAGAAAAG<br/> GCCGGCTCCCTTCAGTGGGCCTACATGGCGATCGCGCGTCTGGGGGG<br/> ATTCATGGATAGTAAGCGGACTGGGATCGCTTCCTGGGGCGCGCTGT<br/> GGGAAGGCTGGGAAGCCCTCCAGAGCAAACCTCGATGGGTTCTGGC<br/> AGCAAAGATCTGATGGCGCAGGGTATCAAGATTTGA</p> |
| Tnp AA  | <p>MITSALHRAADWAKSVFSSAALGDPRRTARLVNVAAQLAKYSGKSITIS<br/> SEGSKAMQEGAYRFIRNPNVSAEAIKAGAMQTVKLAQEFPELLAIEDT<br/> TSLSYRHQVAEELGKLSIQDKSRGWVHVSVLLLEATTFRTVGLLHQE<br/> WWMRPDDPADADEKESGKWLA AATSRLRMGSMMSNVIAVCDREA<br/> DIHAYLQDKLAHNERFVVRSKHPRKDVESGLYLYDHLKNQPELGGYQI<br/> SIGQKGVVDKRGKRKNRPARKASLSLRSGRITLKQGNITLNAVLAEEIN<br/> PPKGETPLKWLLLTSEPVESLAQALRVIDIYTHRWRIEEFHKAWK TGAG<br/> AERQRMEEPDLNLRMVSILSFVAVRLLQLRESFTPPQALRAQGLLKEAE<br/> HVESQSAETVLT PDECQLLYLDKGRKRKEKAGSLQWAYMAIARLG<br/> GFMDSKRTGIASWGALWEGWEALQSKLDGFLAAKDLMAQGIKI</p>                                                                                                                                                                                                                                                                                                                                                                                                                                                                                                                                                                                                                                                                                                                                                                                                                                                                                                                                                                                                                                                                                                                 |

FIG. S1. The Clustal Omega sequence alignment for the transposase sequences used in pBAM1 and pBAM2.

```

pBAM1      ATGATTACCACTGCACTGCATCGTGCGGCGGATTGGGCGAAAAGCGTGTCTTCTAGTGCT 60
pBAM2      ATGATCACATCCGCACTTCACCGAGCAGCAGATTGGGCAAAAAGCGTGTCTTCTAGTTAGCC 60
          ***** **          ***** ** ** ** ** ** ***** ***** ***** * **

pBAM1      GCGCTGGGTGATCCGCGTCTACCGCGCTCTGGTGAATGTTGCGGCGCAACTGGCCAAA 120
pBAM2      GCGCTGGGTGATCCCCGCCGTACCGCCCGTCTGGTGAACGTCGCCGCACAGCTCGCCAAG 120
          ***** ***** ** ***** ***** ***** ** ** ** ** ** *****

pBAM1      TATAGCGGCAAAAGCATTACCATTAGCAGCGAAGGCAGCAAAGCCATGCAGGAAGGCGCG 180
pBAM2      TACTCGGGCAAATCCATTACAATTTCCAGCGAAGGCTCAAAGGCCATGCAAGAGGGCGCC 180
          **          ***** ***** ** ***** ***** ** ***** *****

pBAM1      TATCGTTTTATTTCGTAATCCGAACGTGAGCGCGGAAGCGATTTCGTAAGCGGGTGCCATG 240
pBAM2      TATCGTTTCATCCGCAATCCGAATGTCAGCGCCGAGGCCATTTCGGAAGGCCGGTGCGATG 240
          ***** ** ** ** ***** ** ***** ** ** ***** ** ** ***** **

pBAM1      CAGACCGTGAAACTGGCCCAGGAATTTCCGGAAGTCTGGCAATTGAAGATAACCACCTCT 300
pBAM2      CAGACCGTCAAATTGGCCCAAGAATTTCCCGAGCTGTTGGCGATCGAAGATAACGACGAGC 300
          ***** ** ***** ***** ** ** ** ***** ** ***** *****

pBAM1      CTGAGCTATCGTCATCAGGTGGCGGAAGAAGTGGGCAAACTGGGTAGCATTTCAGGATAAA 360
pBAM2      CTTTCATATCGTCATCAAGTGGCGGAAGAAGTGGGAAAAGTGGGTTCCATCCAGGACAAG 360
          **          ***** ***** ***** ***** ***** ** ***** **

pBAM1      AGCCGTGGTTGGTGGGTGCATAGCGTGCTGCTGCTGGAAGCGACCACCTTTCGTACCGTG 420
pBAM2      TCTCGCGGTTGGTGGGTACTACTCGGTGCTGCTCCTGGAAGCTACCACCTTCCGTACCGTG 420
          ** ***** ** ***** ***** ***** ***** *****

pBAM1      GGCCTGCTGCATCAAGAATGGTGGATGCGTCCGGATGATCCGGCGGATGCGGATGAAAAA 480
pBAM2      GGCTTGTTGCACCAAGAGTGGTGGATGCGCCCGGATGATCCGGCGGACGCGGATGAGAAA 480
          *** ** ***** ***** ***** ***** ***** ***** *****

pBAM1      GAAAGCGGCAAATGGCTGGCCGCTGCTGCAACTTCGCGTCTGAGAATGGGCAGCATGATG 540
pBAM2      GAATCGGGGAAATGGCTGGCTGCTGCCGCGACCAGCCGGCTGCGGATGGGTAGTATGATG 540
          *** ** ***** ***** ***** ** ** ** ***** ** *****

pBAM1      AGCAACGTGATTGCGGTGTGCGATCGTGAAGCGGATATTCATGCGTATCTGCAAGATAAA 600
pBAM2      AGCAACGTGATAGCCGTCTGTGACCGCGAAGCCGACATCCATGCCATCTGCAAGACAAG 600
          ***** ** ** ** ** ** ***** ** ***** ***** ***** *****

pBAM1      CTGGCCATAACGAACGTTTTGTGGTGCCTAGCAAACATCCGCGTAAAGATGTGGAAAGC 660
pBAM2      CTCGCGCATAATGAACGTTTTGTGGTTCGCTCCAAGCACCCGCGCAAAGACGTTGAGTCG 660
          ** ** ***** ***** ***** ** ***** ***** ***** **

pBAM1      GGCCTGTATCTGTATGATCACCTGAAAAACCAGCCGGAAGTGGGCGGCTATCAGATTAGC 720
pBAM2      GGGCTGTACCTGTACGACCACCTCAAAAACCAGCCTGAGTTGGGCGGATAACCAGATTTC 720
          ** ***** ***** ** ***** ***** ***** ** ***** *****

pBAM1      ATTCCGCAGAAAGGCGTGGTGGATAAACGTGGCAAACGTAAAAACCGTCCGGCGCGTAAA 780
pBAM2      ATTGCCAGAAAGGCGTCTGTTGACAAGCGGGTAAGCGCAAGAATCGCCCCGCCGGAAA 780
          *** ***** ** ** ** ** ***** ** ***** ***** ***** *****

```

pBAM1 GCGAGCCTGAGCCTGCGTAGCGGCCGTATTACCCTGAAACAGGGCAACATTACCCTGAAC 840  
pBAM2 GCCTCTCTCTCCCTGCGGAGTGGGCGTATCACCCCTCAAGCAAGGTAATATCACGCTCAAC 840  
\*\* \*\* \*\*\*\*\* \*\* \*\* \*\*\*\*\* \*\*\*\*\* \*\* \*\* \*\* \*\*

pBAM1 GCGGTGCTGGCCGAAGAAATTAATCCGCCGAAAGGCGAAACCCCGCTGAAATGGCTGCTG 900  
pBAM2 GCCGTACTGGCGGAAGAGATCAACCCCCCAAAGGTGAGACTCCATTGAAGTGGCTGCTG 900  
\*\* \*\* \*\*\*\*\* \*\*\*\*\* \*\* \*\* \*\* \*\* \*\*\*\*\* \*\* \*\* \*\*

pBAM1 CTGACCAGCGAGCCGGTGGAAAGTCTGGCCCAAGCGCTGCGTGTGATTGATATTTATAACC 960  
pBAM2 CTGACCAGCGAGCCCGTGGAGTCTCTGGCCCAAGCGCTGCGCGTGATTGACATTTATAACC 960  
\*\*\*\*\* \*\*\*\*\* \*\*\*\*\* \*\*\*\*\* \*\*\*\*\* \*\*\*\*\* \*\*\*\*\* \*\*\*\*\*

pBAM1 CATCGTTGGCGCATTGAAGAATTTACAAAGCGTGAAAACGGGTGCGGGTGCAGAACGT 1020  
pBAM2 CACCGGTGGCGAATCGAAGAATTTACATAAAGCCTGGAAAACGGGTGCCGGAGCGGAGCGT 1020  
\*\* \*\* \*\*\*\*\* \*\* \*\*\*\*\* \*\*\*\*\* \*\*\*\*\* \*\*\*\*\* \*\*\*\*\* \*\*

pBAM1 CAGCGTATGGAAGAACCGGATAACCTGGAACGTATGGTGAGCATTCTGAGCTTTGTGGCG 1080  
pBAM2 CAGCGGATGGAAGAACCTGATAATCTCGAACGCATGGTCAGTATCCTCAGCTTTGTGGCC 1080  
\*\*\*\*\* \*\*\*\*\* \*\*\*\*\* \*\* \*\*\*\*\* \*\*\*\*\* \*\* \*\* \*\*

pBAM1 GTGCGTCTGCTGCAACTGCGTGAATCTTTTACTCCGCCGCAAGCACTGCGTGCGCAGGGC 1140  
pBAM2 GTGCGCCTGCTGCAACTGCGTGAGTCGTTACCCACCGCAGGCCCTGCGAGCTCAAGGG 1140  
\*\*\*\*\* \*\*\*\*\* \*\*\*\*\* \*\* \*\* \*\* \*\*\*\*\* \*\* \*\*\*\*\* \*\* \*\*

pBAM1 CTGCTGAAAGAAGCGGAACACGTTGAAAGCCAGAGCGCGGAAACCGTGCTGACCCCGGAT 1200  
pBAM2 CTCTTGAAGAAGCCGAACATGTGAGTCCCAAAGCGCCGAAACGGTACTGACGCCGGAT 1200  
\*\* \*\*\*\*\* \*\*\*\*\* \*\* \*\* \*\*\*\*\* \*\*\*\*\* \*\*\*\*\* \*\* \*\*\*\*\* \*\*\*\*\*

pBAM1 GAATGCCAACTGCTGGGCTATCTGGATAAAGGCAAACGCAAACGCAAAGAAAAGCGGGC 1260  
pBAM2 GAGTGCCAGTTGTTGGGATATCTCGATAAAGGCAAAGCGCAAAGCGGAAAGAAAAGCGGGC 1260  
\*\* \*\*\*\*\* \*\* \*\*\*\*\* \*\*\*\*\* \*\*\*\*\* \*\*\*\*\* \*\*\*\*\* \*\*\*\*\* \*\*\*\*\*

pBAM1 AGCCTGCAATGGGCGTATATGGCGATTGCGCGTCTGGGCGGCTTTATGGATAGCAAACGT 1320  
pBAM2 TCCCTTCAGTGGGCCTACATGGCGATCGCGCGTCTGGGGGGATTTCATGGATAGTAAGCGG 1320  
\*\*\* \*\* \*\*\*\*\* \*\* \*\*\*\*\* \*\*\*\*\* \*\*\*\*\* \*\* \*\* \*\*\*\*\* \*\* \*\*

pBAM1 ACCGGCATTGCGAGCTGGGGTGCCTGTGGGAAGGTTGGGAAGCGCTGCAAAGCAAACCTG 1380  
pBAM2 ACTGGGATCGCTTCCTGGGGCGCGCTGTGGGAAGGCTGGGAAGCCCTCCAGAGCAAACCTC 1380  
\*\* \*\* \*\* \*\* \*\*\*\*\* \*\*\*\*\* \*\*\*\*\* \*\*\*\*\* \*\*\*\*\* \*\*\*\*\* \*\*\*\*\*

pBAM1 GATGGCTTTCTGGCCGCGAAAGACCTGATGGCGCAGGGCATTAAAATCTAA 1431  
pBAM2 GATGGGTTTCTGGCAGCAAAGATCTGATGGCGCAGGGTATCAAGATTTGA 1431  
\*\*\*\*\* \*\* \*\*\*\*\* \*\* \*\*\*\*\* \*\*\*\*\* \*\*\*\*\* \*\*\*\*\* \*\*\*\*\* \*\*

FIG. S2. Maps of pBAM2-GFP and pBAM2-KDC plasmids used to generate chromosomally integrated *A. ferrooxidans* strains with the super-folder (sfGFP) and 2-keto decarboxylase (KDC) genes, respectively. Top: pBAM2-GFP contains the codon-optimized version of the transposase and the sfGFP gene. Bottom: pBAM2-KDC contains the codon-optimized version of the transposase and the KDC gene.

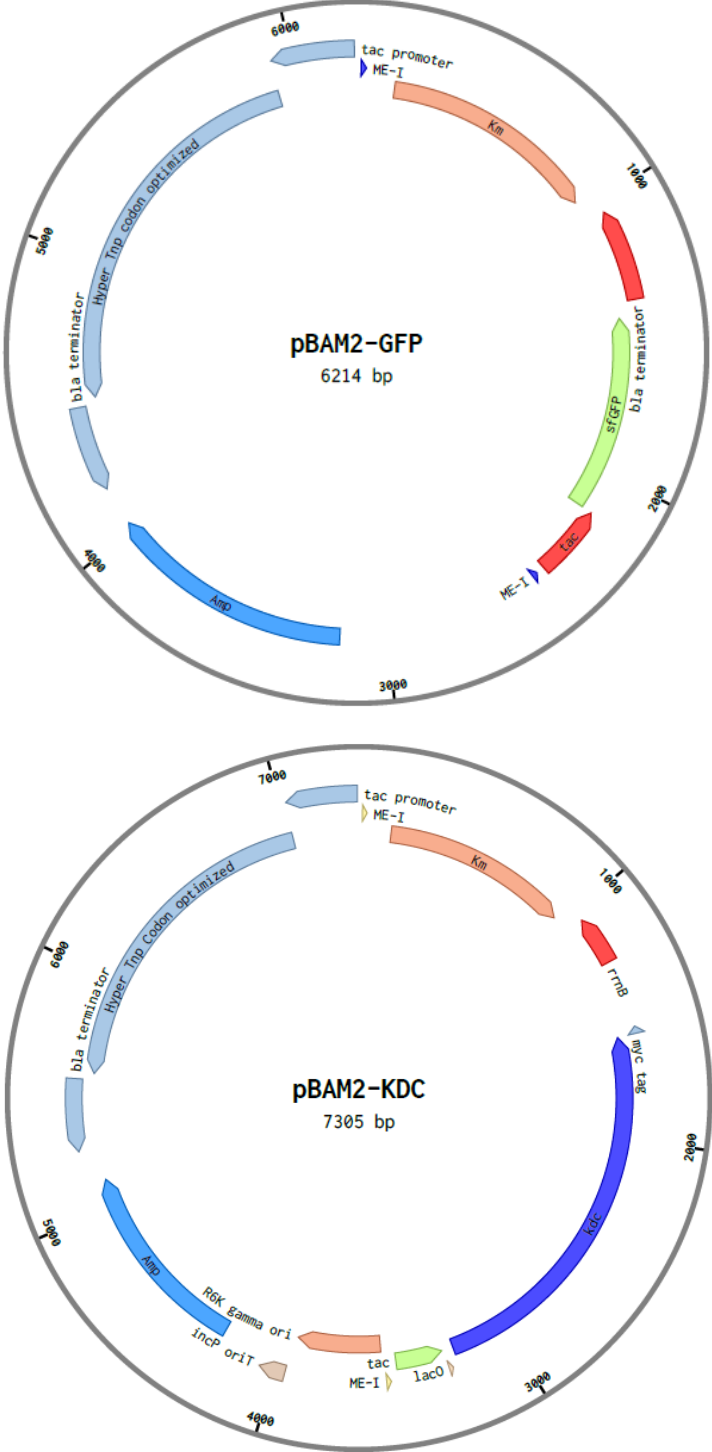

FIG. S3. Schematic representation of the inverse PCR method used in this study. The genomic DNA from the mutant strains were digested overnight with EcoRI. The cut DNA was ligated intramolecularly resulting in two circular pieces of DNA containing a portion of tn5 and the flanking genomic DNA. The ligated DNA was used as a template for four PCR reactions using the primers shown to amplify the flanking genomic DNA. The shorter fragment of DNA amplified was sequenced with the sequencing primers, tnFSeq and tnRSeq.

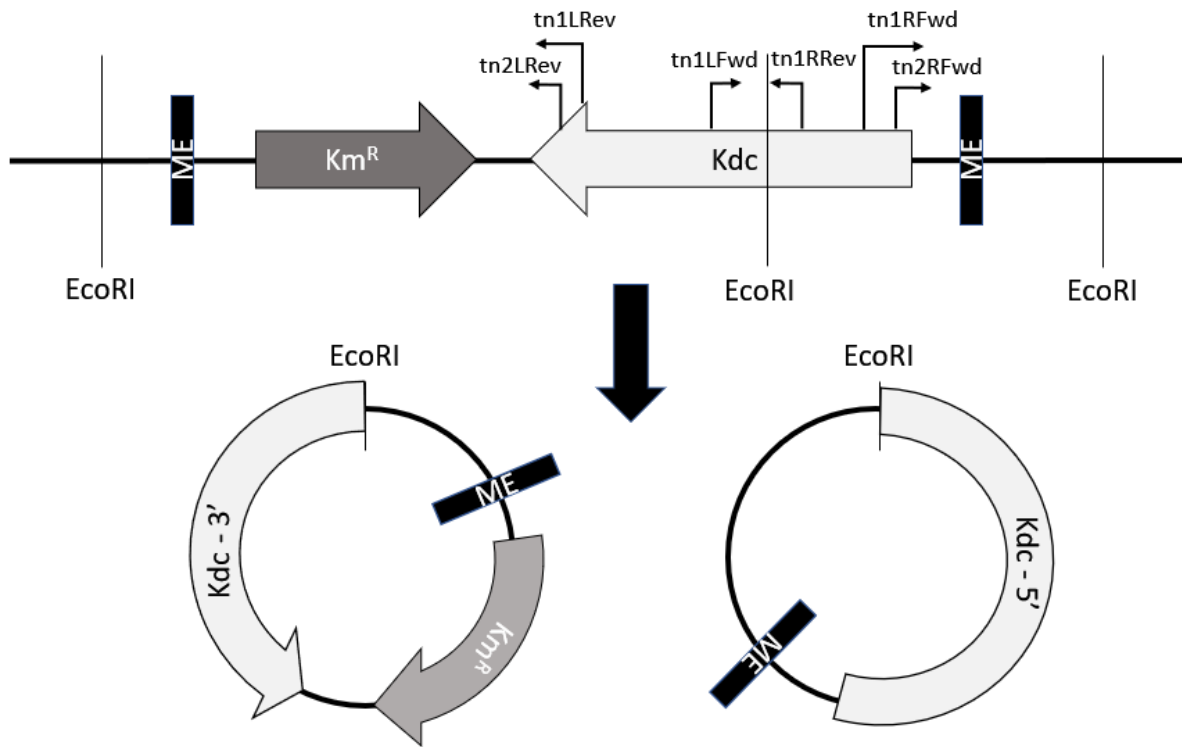

Table S2. Media formulations used in this study. AFM3 and F2S media were adjusted to pH 1.8. S204 and SM4 medium were adjusted to pH 5.0. Fe<sub>2</sub>(SO<sub>4</sub>)<sub>3</sub>·5H<sub>2</sub>O was used for adding Fe(III); however, the weight by volume is calculated for the amount of Fe(III) ions in solution.

| <b>AFM3 (F2S)</b>                                                       | <b>Mating</b>                                             | <b>S204</b>                                               | <b>SM4</b>                                                              |
|-------------------------------------------------------------------------|-----------------------------------------------------------|-----------------------------------------------------------|-------------------------------------------------------------------------|
| 0.8 g/L (NH <sub>4</sub> ) <sub>2</sub> SO <sub>4</sub>                 | 0.625% (w/v) agar                                         | 0.625% (w/v) agar                                         | 0.8 g/L (NH <sub>4</sub> ) <sub>2</sub> SO <sub>4</sub>                 |
| 0.1 g/L HK <sub>2</sub> PO <sub>4</sub>                                 | 11.25 g/L (NH <sub>4</sub> ) <sub>2</sub> SO <sub>4</sub> | 11.25 g/L (NH <sub>4</sub> ) <sub>2</sub> SO <sub>4</sub> | 0.1 g/L HK <sub>2</sub> PO <sub>4</sub>                                 |
| 2.0 g/L MgSO <sub>4</sub> ·7H <sub>2</sub> O                            | 0.38 g/L KCl                                              | 0.38 g/L KCl                                              | 2.0 g/L MgSO <sub>4</sub> ·7H <sub>2</sub> O                            |
| 5ml/L Trace Mineral Supplement (ATCC <sup>®</sup> MD-TMS <sup>™</sup> ) | 1.86 g/L MgSO <sub>4</sub> ·7H <sub>2</sub> O             | 1.86 g/L MgSO <sub>4</sub> ·7H <sub>2</sub> O             | 5ml/L Trace Mineral Supplement (ATCC <sup>®</sup> MD-TMS <sup>™</sup> ) |
| 10 mM Citric Acid                                                       | 0.0005% (w/v) Fe(III)                                     | 0.04% (w/v) Fe(III)                                       | 1 mM Citric Acid                                                        |
| 100 mM FeSO <sub>4</sub> ·7H <sub>2</sub> O                             | 0.05% (w/v) NaS <sub>2</sub> O <sub>3</sub>               | 0.2% (w/v) NaS <sub>2</sub> O <sub>3</sub>                | 0.0005% (w/v) Fe(III)                                                   |
| 0.1% (w/v) colloidal sulfur for F2S                                     | 100 μM diaminopimelic acid                                | 100 μM diaminopimelic acid                                | 100 μM diaminopimelic acid                                              |
|                                                                         | 40 μg/mL leucine                                          | 40 μg/mL leucine                                          | 40 μg/mL leucine                                                        |
|                                                                         | 0.05% (w/v) yeast extract                                 | 225 μg/mL kanamycin                                       | 0.1% (w/v) colloidal sulfur                                             |
|                                                                         |                                                           |                                                           | 250 μg/mL kanamycin                                                     |
